# Supplementary material
Source: publisher site journal article supplement (https://www.dovepress.com/article/241157)

## Supplementary Figure Captions

### **Figure S1. CuONPs triggered DNA damage in HUVECs.**

(A-D) The intensities of the bands on the western blotting in Figure 2E were analyzed using an ImageJ software. One-way ANOVA followed by Tukey's test was performed for statistical analysis.  $**p < 0.05$  versus untreated HUVECs.

### **Figure S2. CuONPs treatment caused oxidative stress in HUVECs.**

(A) and (B) The fluorescence intensities in Figure 3A and 3B were analyzed using CytExpert software, respectively. Unpaired Student's *t*-tests were performed for statistical analysis.  $**p < 0.05$  versus untreated HUVECs. (C-D) The intensities of the bands on the western blotting in Figure 3C were analyzed using an ImageJ software. One-way ANOVA followed by Tukey's test was performed for statistical analysis.  $**p < 0.05$  versus untreated HUVECs.

### **Figure S3. Oxidative stress mediated DNA damage and cell death in CuONPs-treated HUVECs.**

(A) The fluorescence intensities in Figure 4B were analyzed using CytExpert software. One-way ANOVA followed by Tukey's test was performed for statistical analysis.  $**p < 0.05$ . (B-E) The intensities of the bands on the western blotting in Figure 4C were analyzed using an ImageJ software. One-way ANOVA followed by Tukey's test was performed for statistical analysis.  $**p < 0.05$ .

### **Figure S4. p38 MAPK was involved in DNA damage and cell death in CuONPs-treated HUVECs.**

The intensities of the bands on the western blotting in Figure 5A-5C were analyzed

using an ImageJ software, respectively. One-way ANOVA followed by Tukey's test was performed for statistical analysis.  $**p < 0.05$ .

**Figure S5. Copper ions chelator TTM alleviated HUVECs DNA damage and cell death induced by CuONPs.**

(A) and (B) The fluorescence intensities in Figure 6A and 6B were analyzed using CytExpert software, respectively. One-way ANOVA followed by Tukey's test was performed for statistical analysis.  $**p < 0.05$ . (C) and (D) The intensities of the bands on the western blotting in Figure 6D and 6F were analyzed using an ImageJ software, respectively. One-way ANOVA followed by Tukey's test was performed for statistical analysis.  $**p < 0.05$ . (E) The fluorescence intensities in Figure 6H were analyzed using CytExpert software, respectively. One-way ANOVA followed by Tukey's test was performed for statistical analysis.  $**p < 0.05$ .

**Figure S1.**

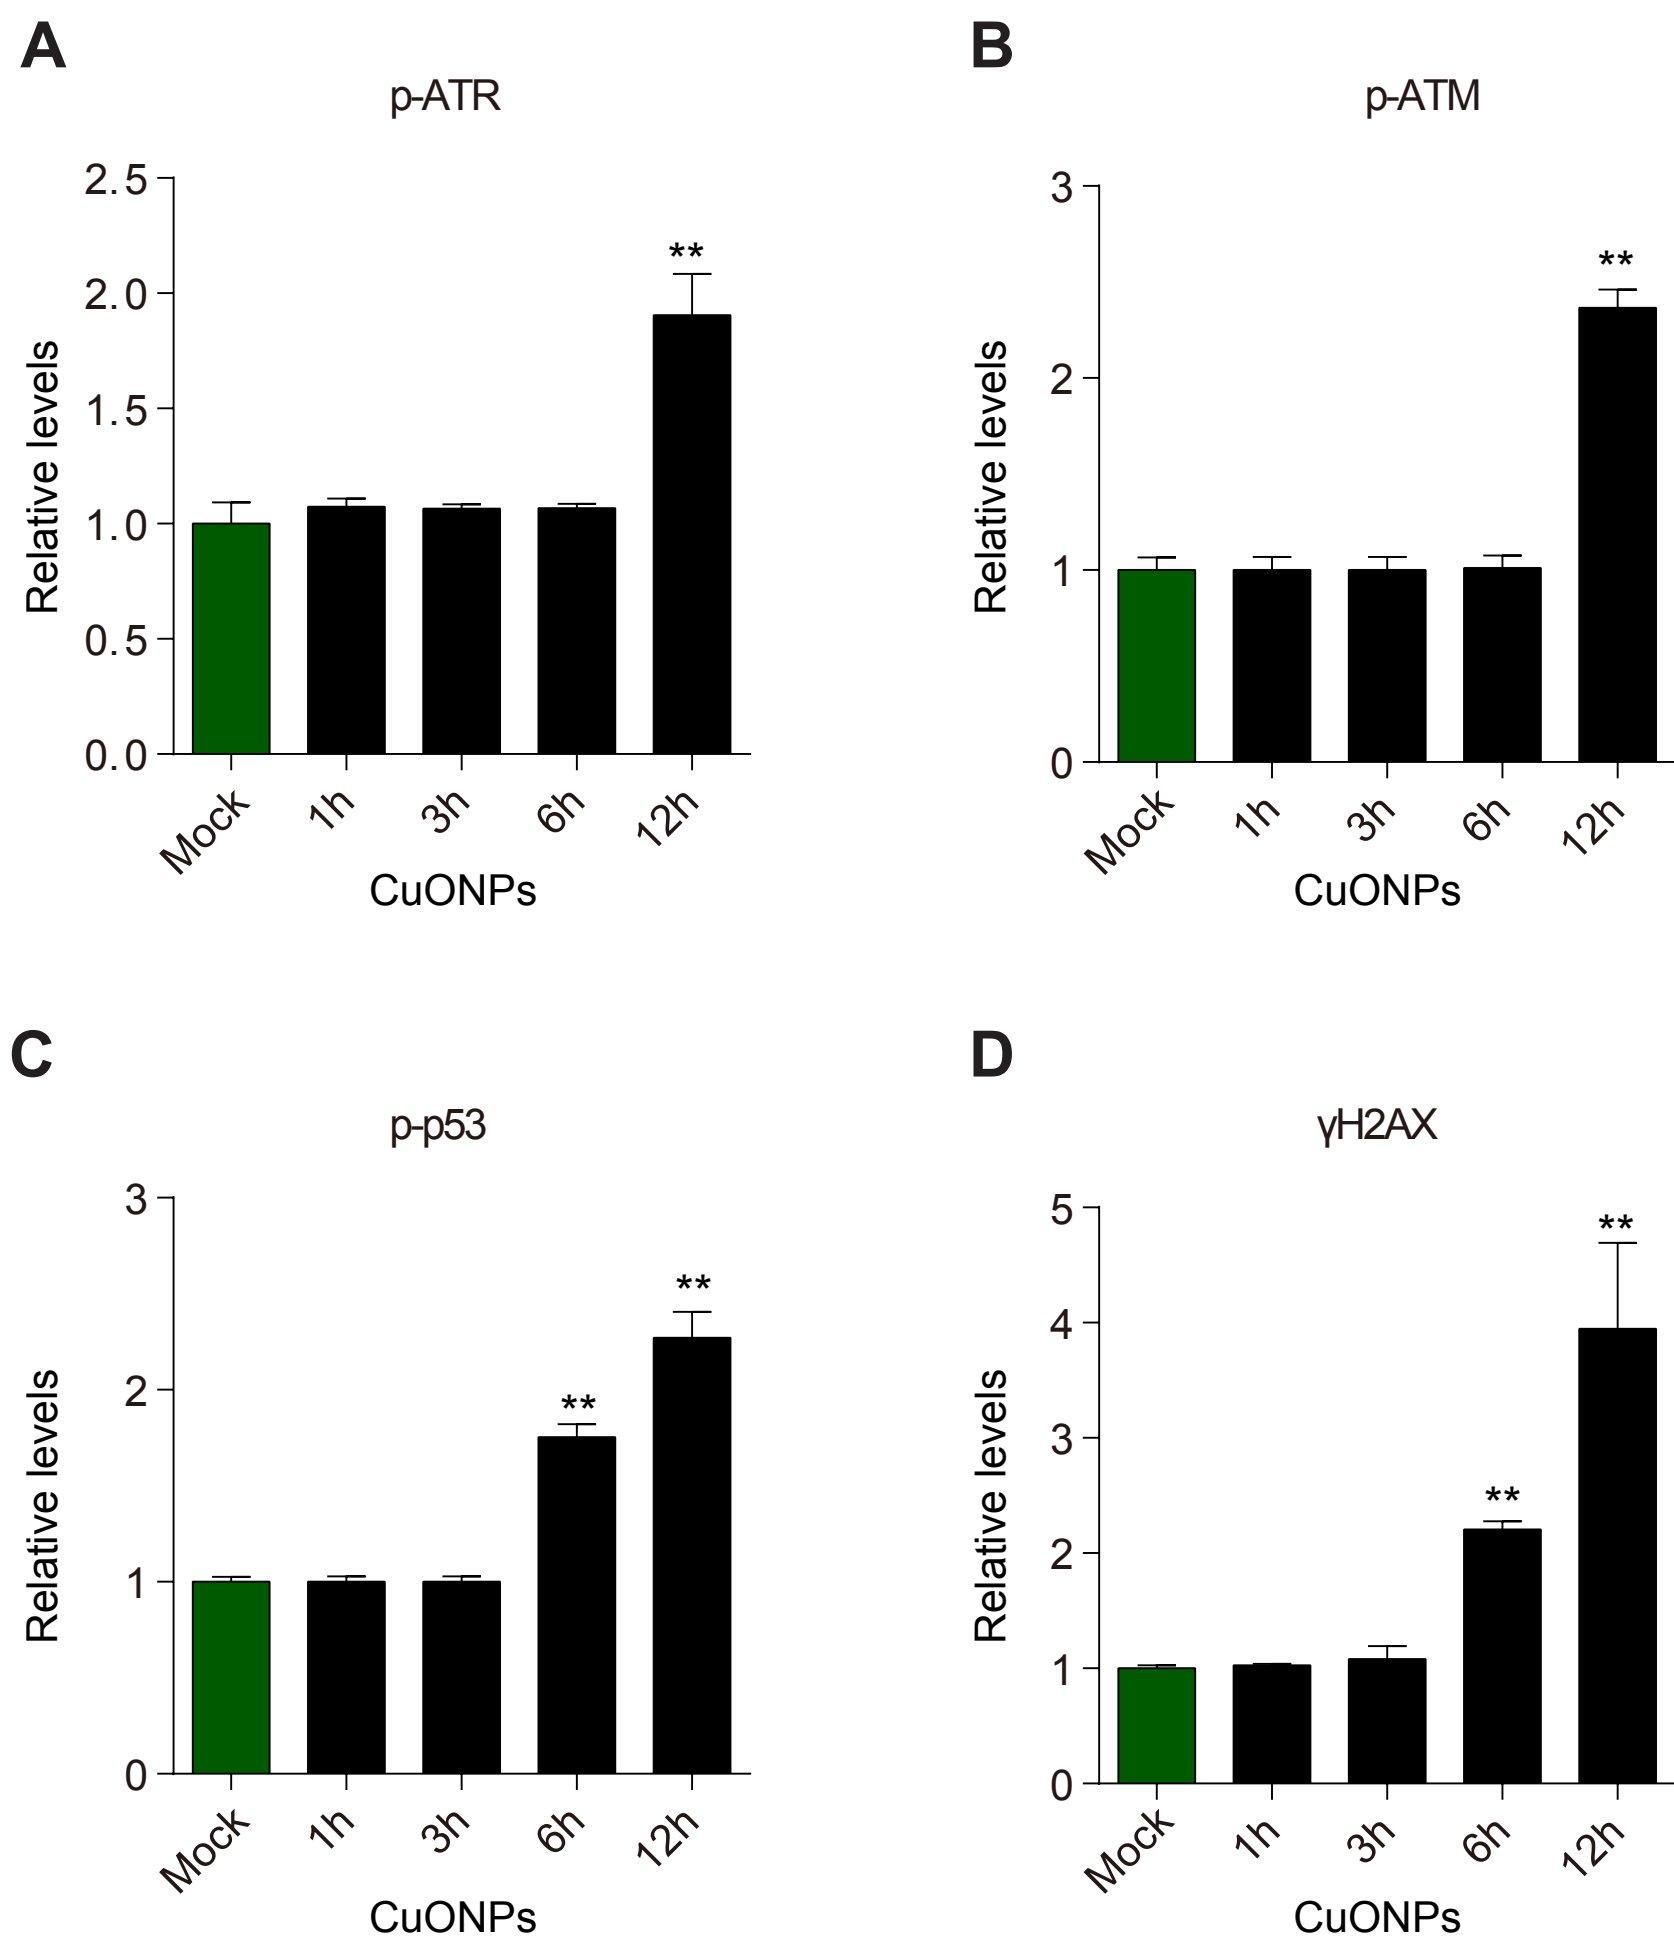

**Figure S2**

**A**

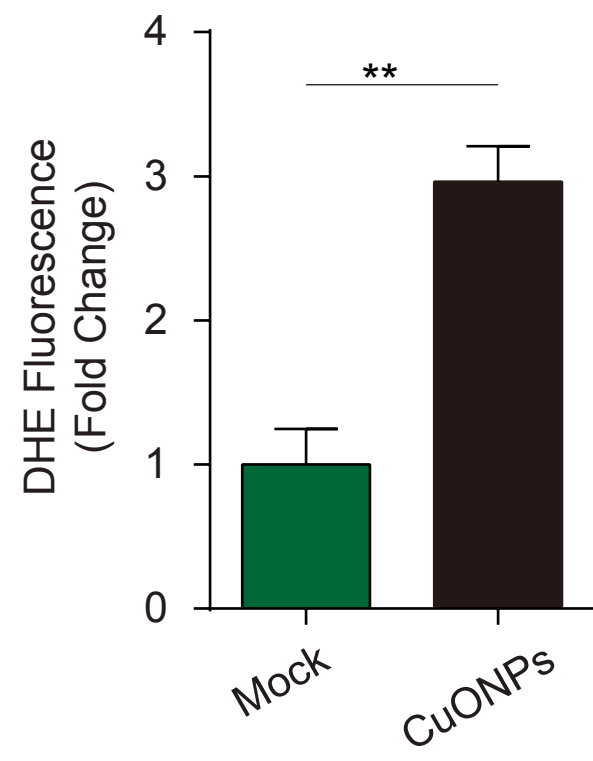

**B**

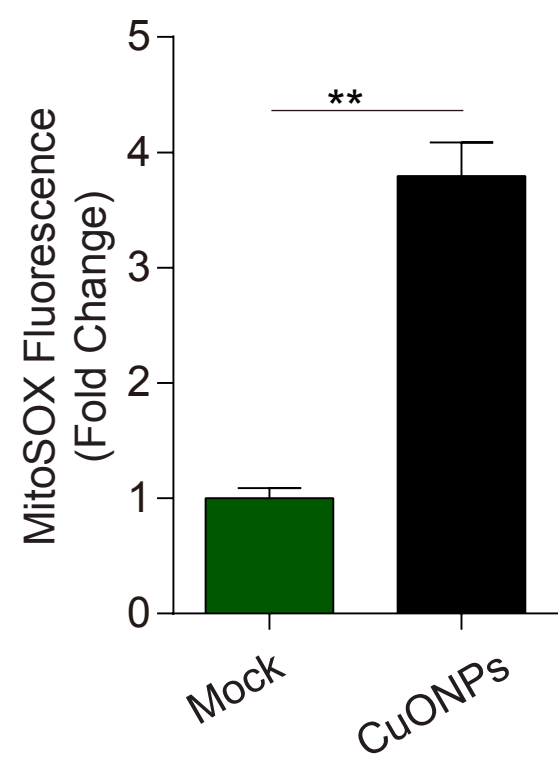

**C**

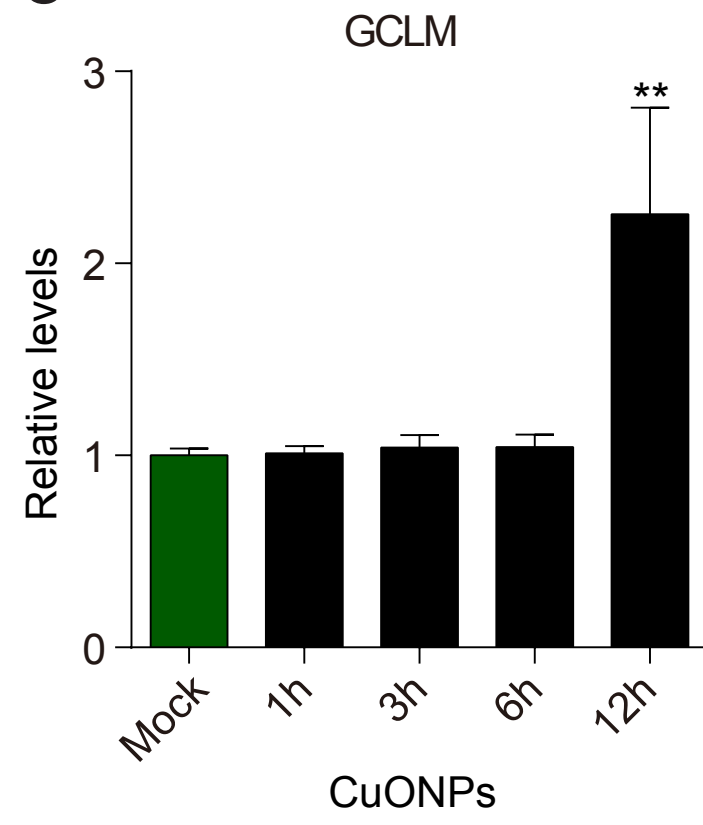

**D**

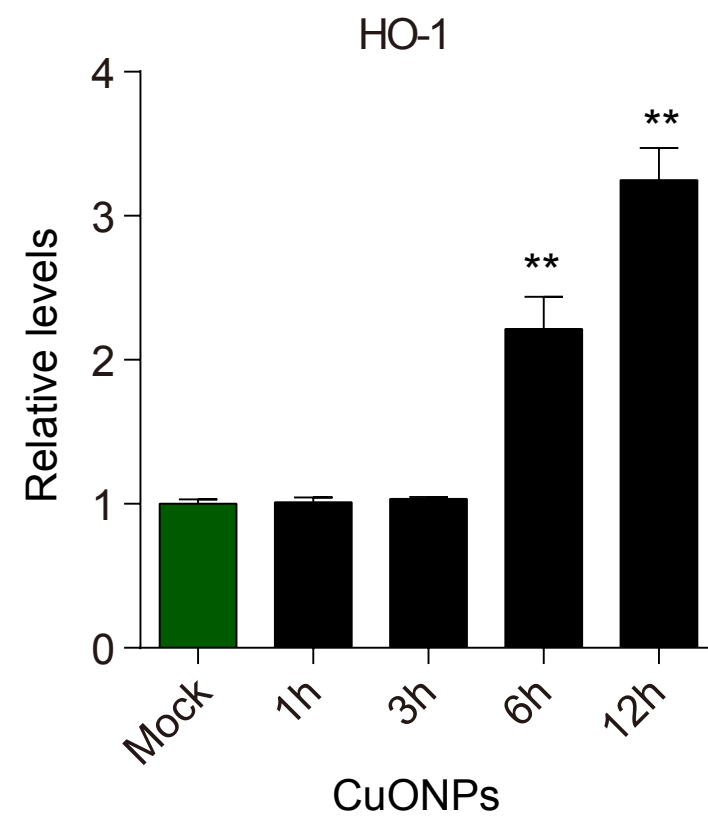

**Figure S3**

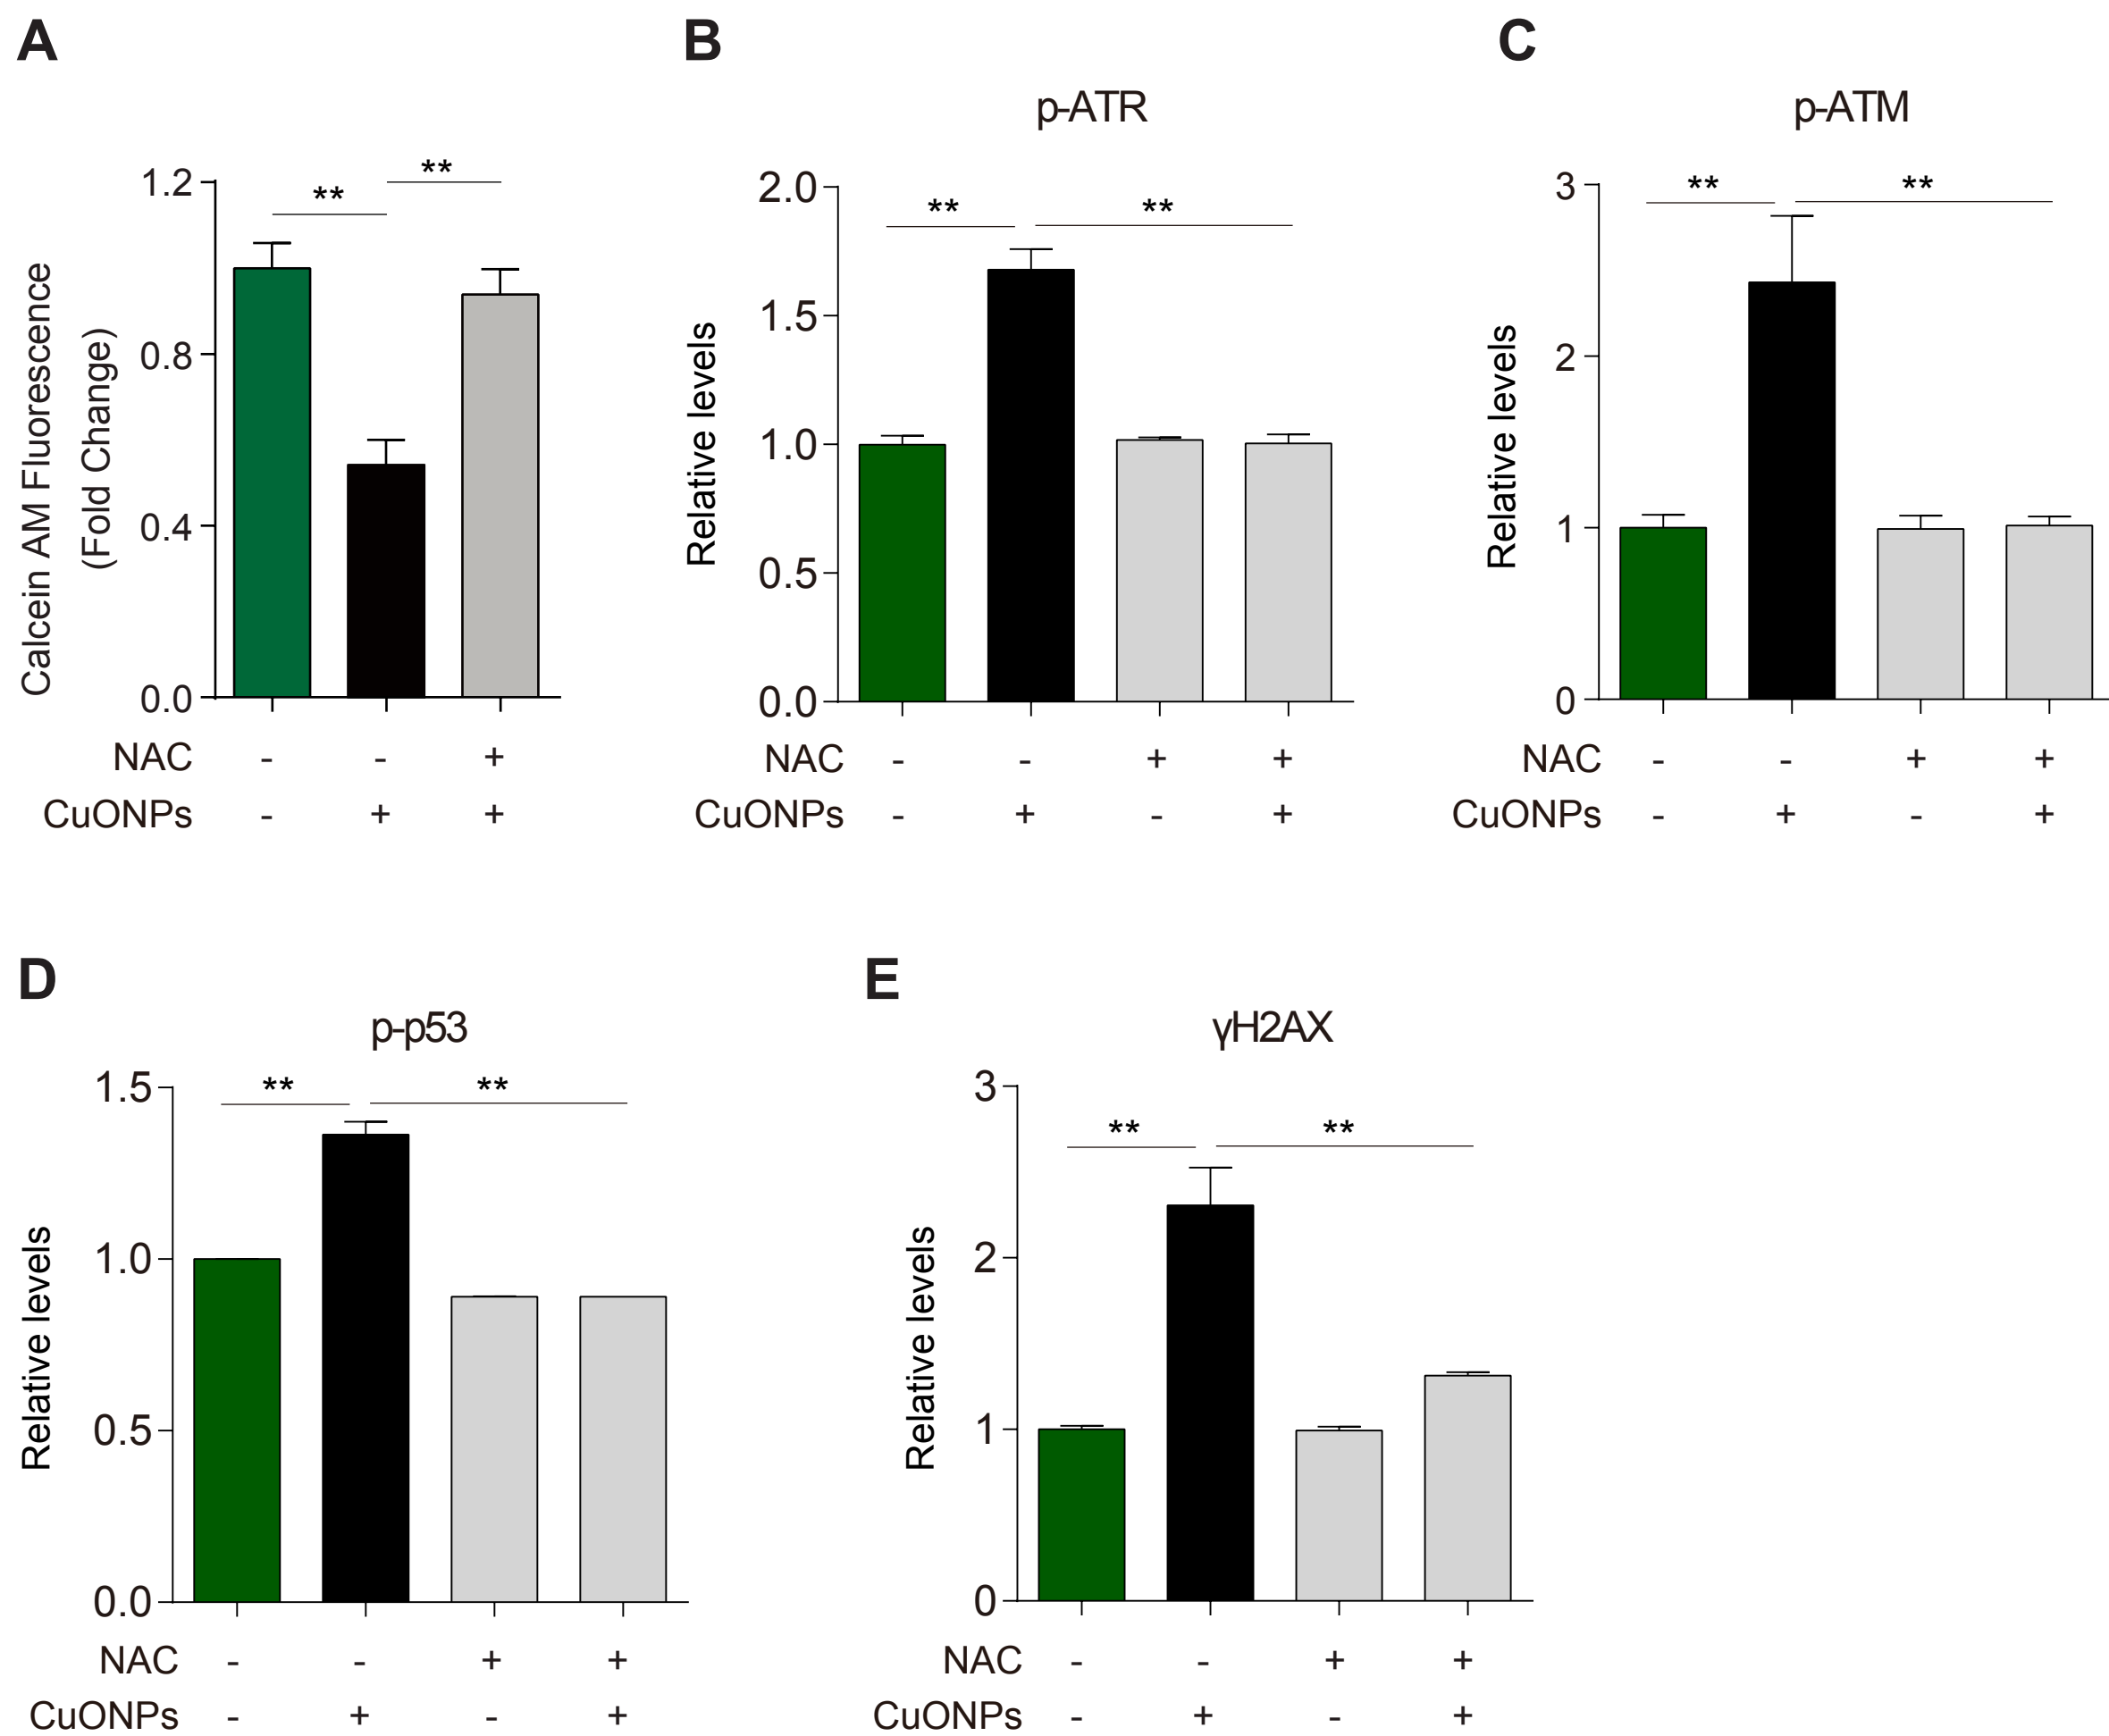

Figure S4

**A**

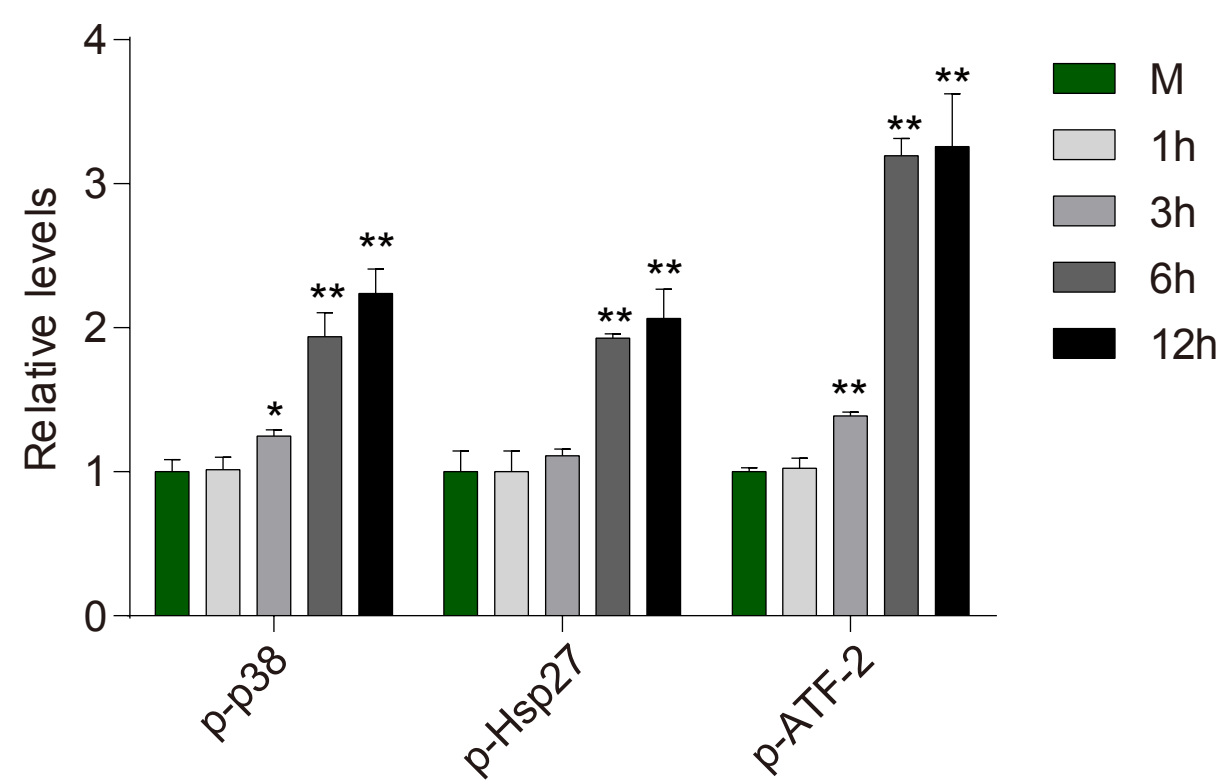

**B**

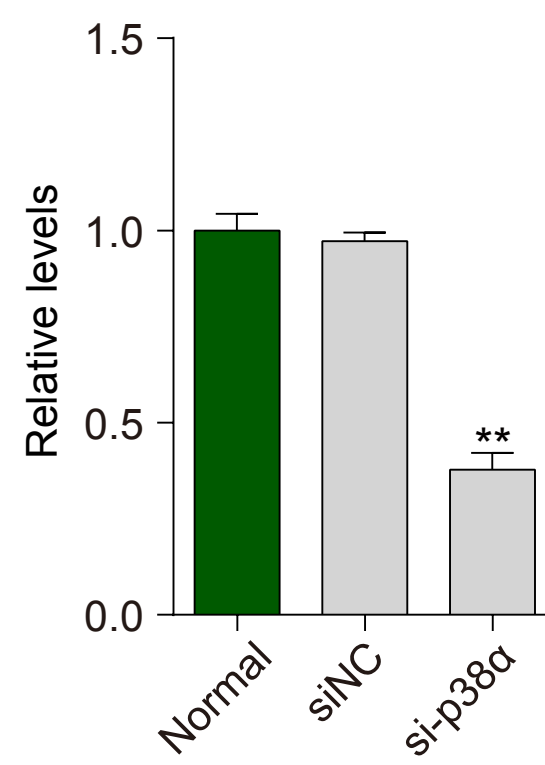

**C**

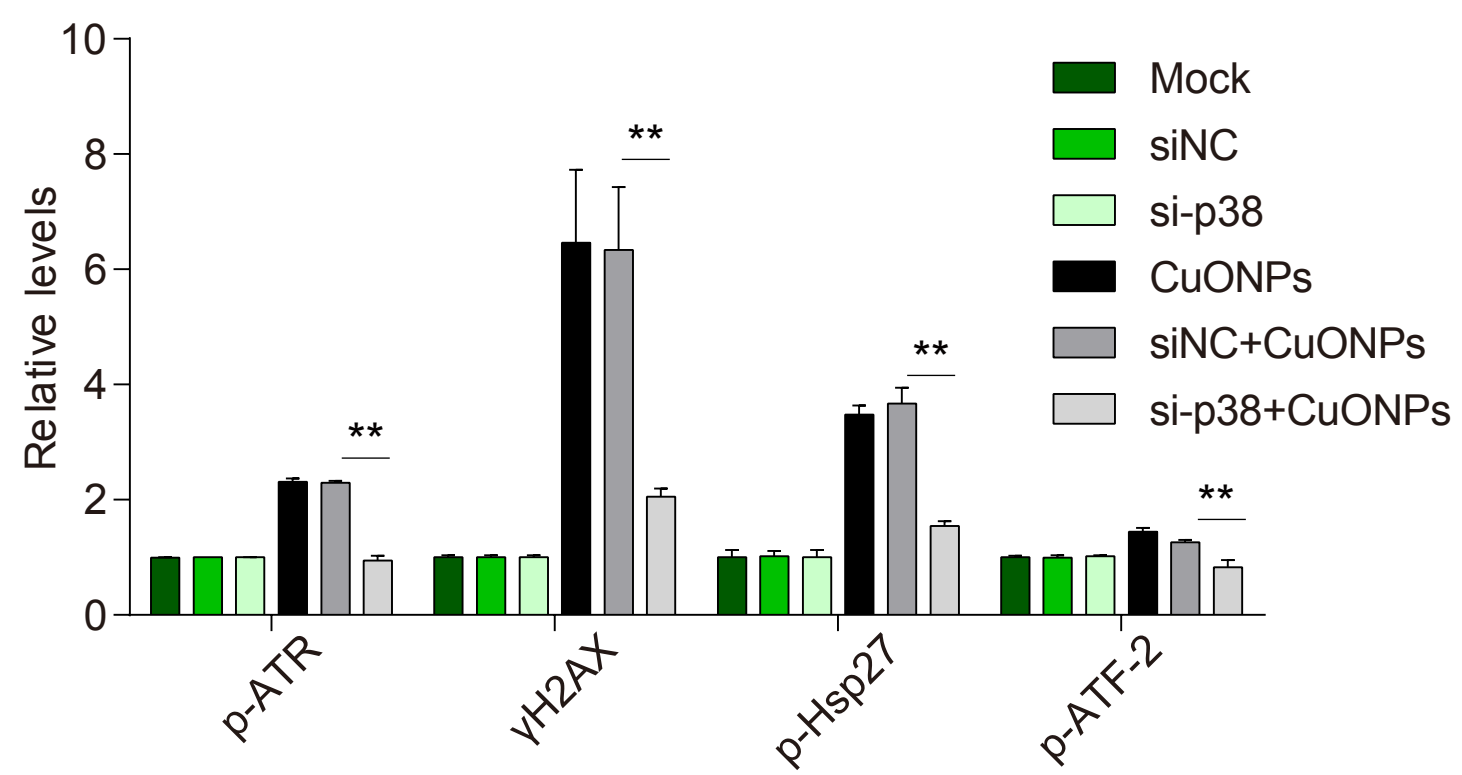

**Figure S5**

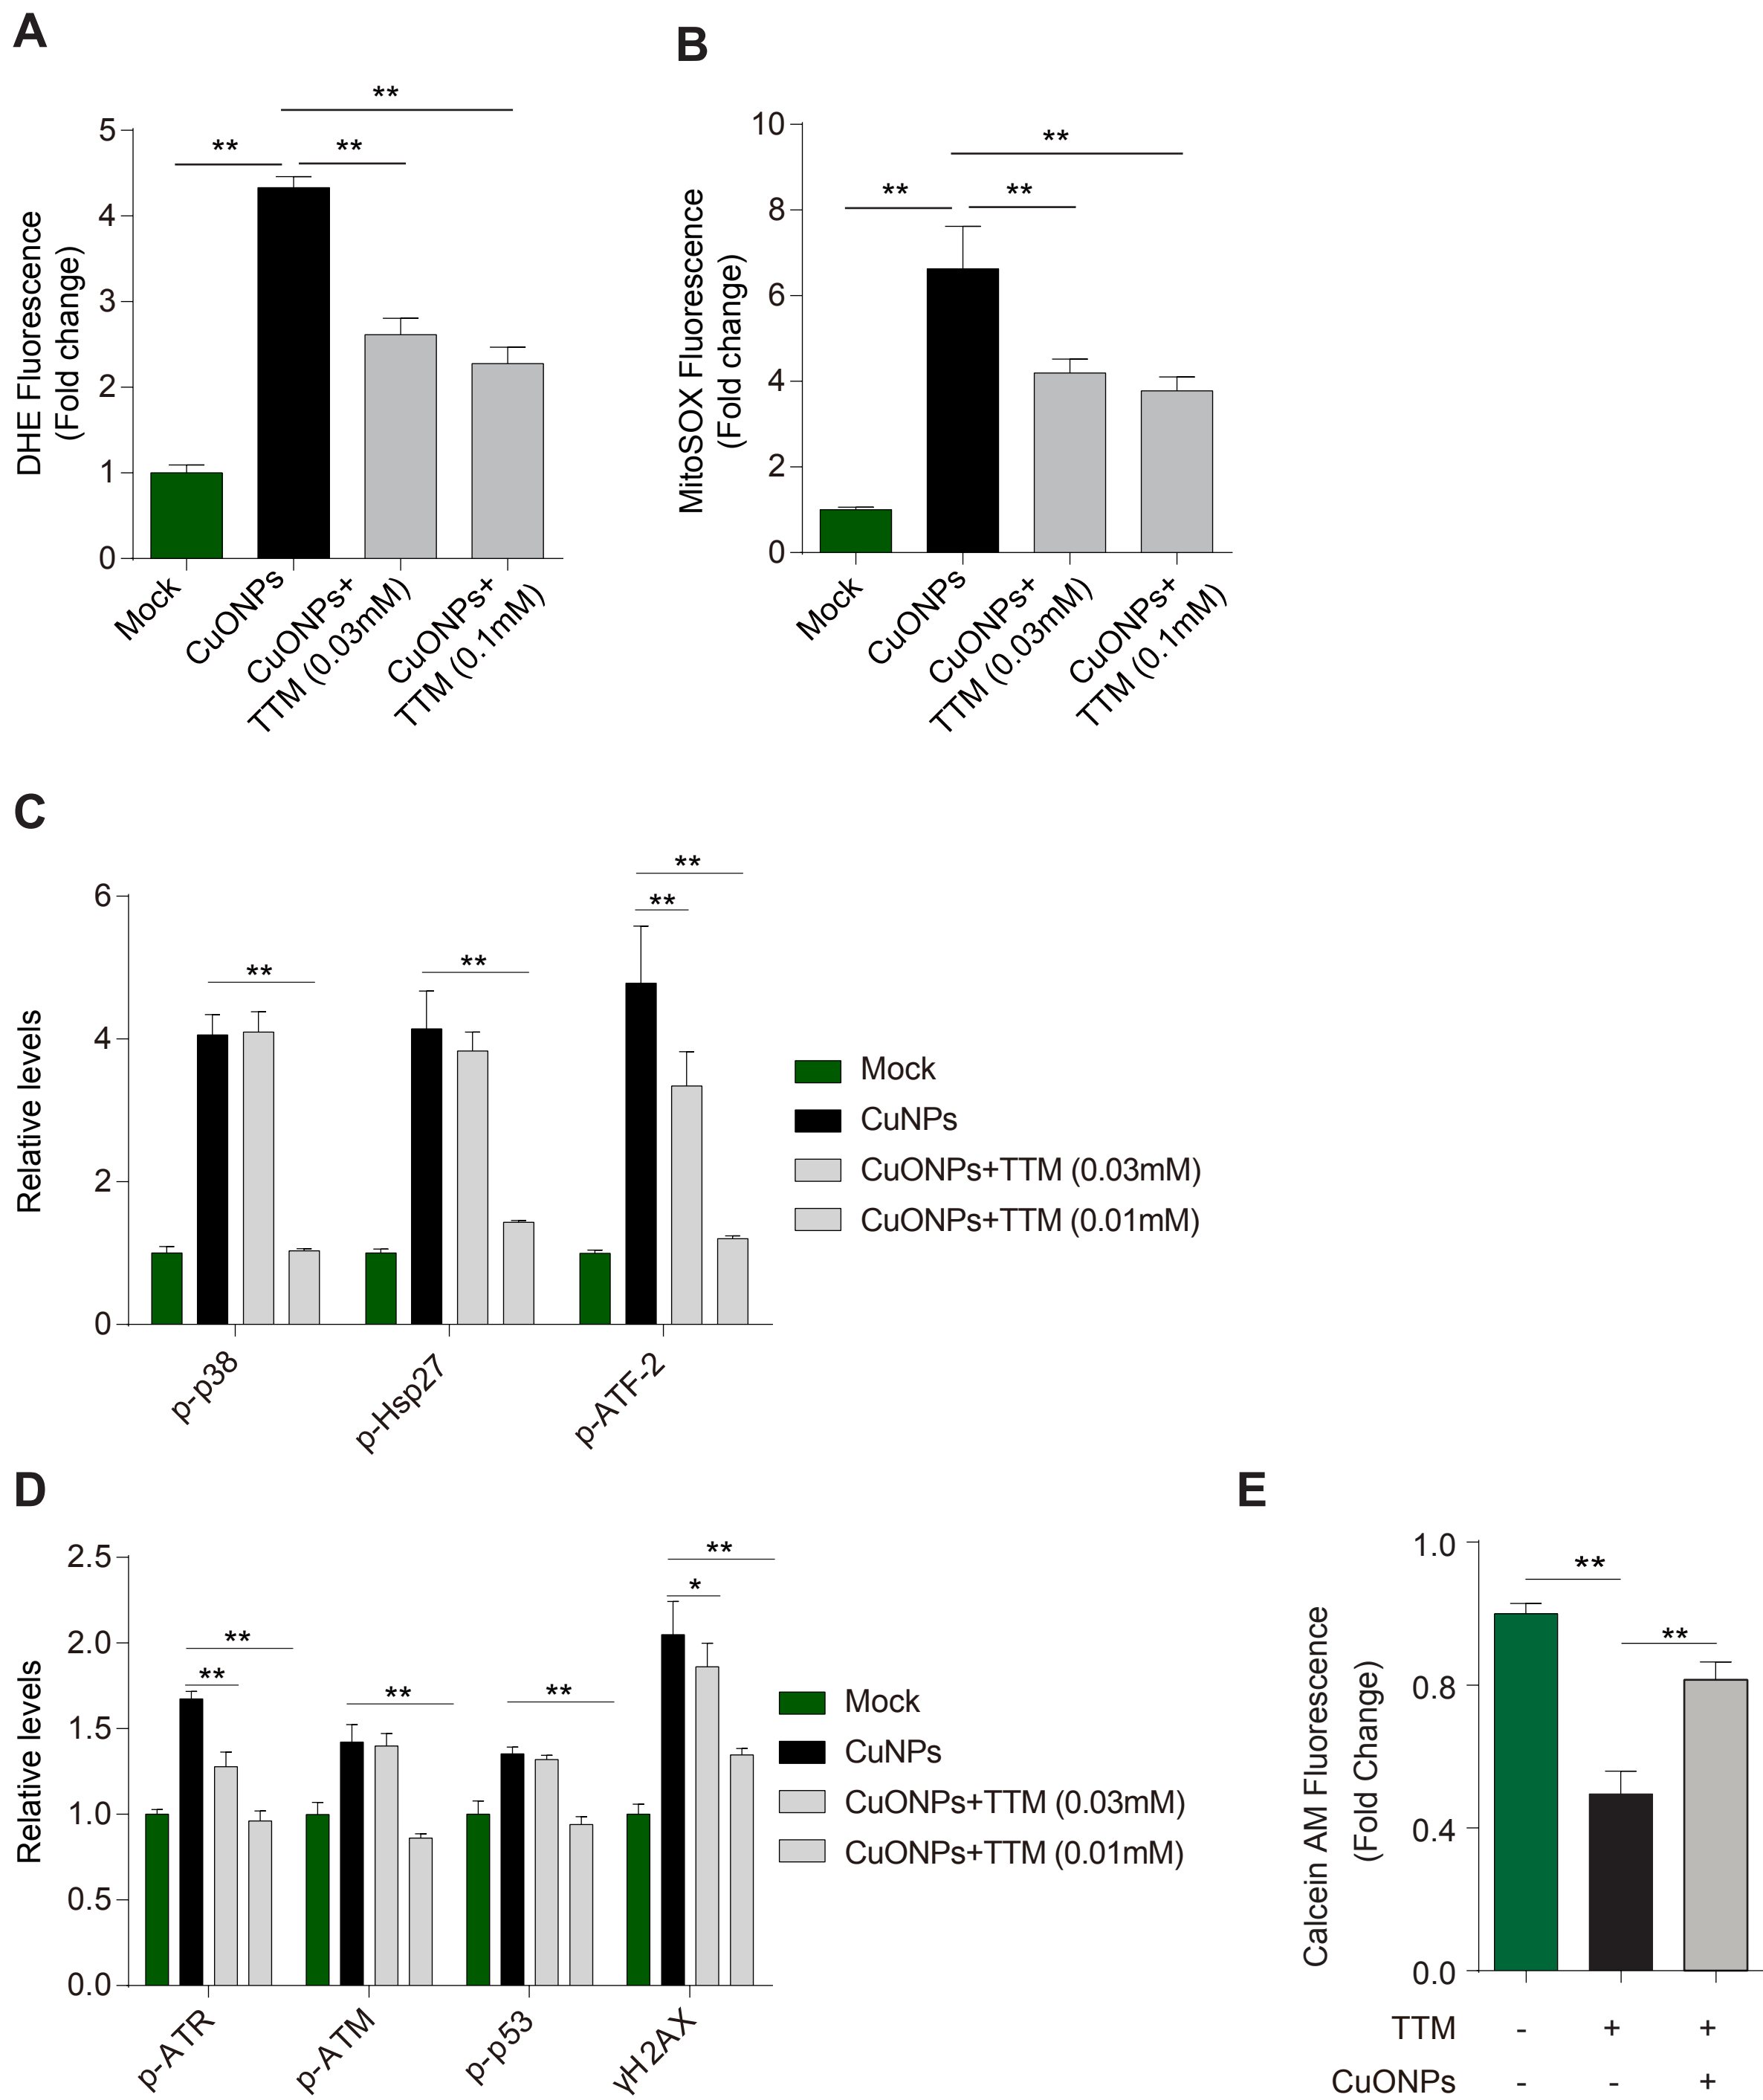

Supplement: Supplementary file 1 [file get_supplementary_file.php]
